# Supplementary material for: National trends in hospitalization and mortality rates for patients with HIV, HCV, or HIV/HCV coinfection from 1996–2010 in the United States: a cross-sectional study
Source: PubMed Central journal article supplement (PMC4287456; doi:10.1186/1471-2334-14-536), 2014-10-10

**Median LOS for patients with HIV monoinfection**

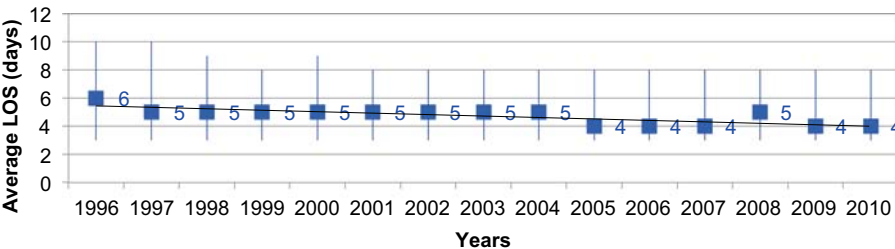

**Median LOS for patients with HCV monoinfection**

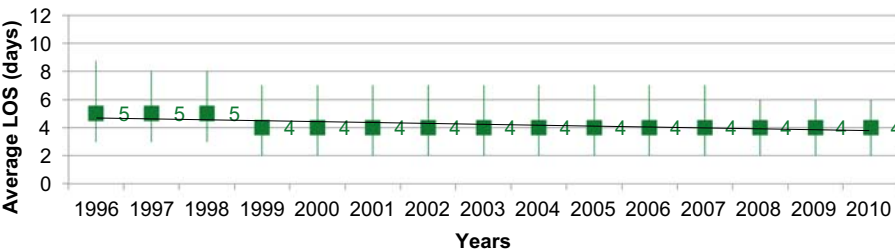

**Median LOS for patients with HIV/HCV coinfection**

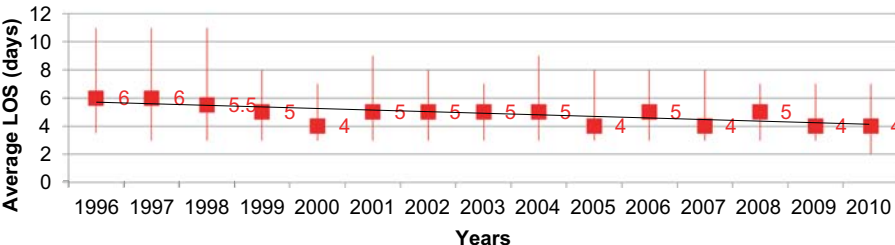

Supplement: 12879_2014_3859_MOESM3_ESM.pdf [file 12879_2014_3859_MOESM3_ESM.pdf]
